# Supplementary material
Source: PubMed Central journal article supplement (PMC2949041)
Supplement: pp.110.162792_1.pdf [file pp.110.162792_1.pdf]

**Table S1.** The results of two-way ANOVA for the effects of ethylene and accession on the elongation of the 3<sup>rd</sup> oldest petioles of *R. palustris* in 3 d in Figure 1D.

|                    | DF | F value    |
|--------------------|----|------------|
|                    |    | Elongation |
| Ethylene           | 4  | 18.20***   |
| Accession          | 1  | 43.32***   |
| Ethylene×accession | 4  | 2.64\$     |

F-values and their significance are given. Significance levels are as follows: \$:  $0.05 < P < 0.1$ ; \*\*\*:  $P < 0.001$ .

**Table S2.** The results of three-way ANOVA for the effects of treatment, accession, and time on concentrations of soluble sugars, fructans and starch in the shoots and roots of *R. palustris* in Figure 2.

|                          | DF | F value              |                |              |                     |               |             |
|--------------------------|----|----------------------|----------------|--------------|---------------------|---------------|-------------|
|                          |    | Shoot soluble sugars | Shoot fructans | Shoot starch | Root soluble sugars | Root fructans | Root starch |
| Treatment                | 1  | 93.97***             | 63.39***       | 53.97***     | 63.51***            | 1.27ns        | 0.04ns      |
| Accession                | 1  | 3.81\$               | 1.37ns         | 0.40ns       | 9.00**              | 0.53ns        | 5.73*       |
| Time                     | 3  | 1.94ns               | 2.88*          | 0.50ns       | 1.70ns              | 1.03ns        | 2.29\$      |
| Treatment×accession      | 1  | 2.99\$               | 1.82ns         | 0.09ns       | 0.02ns              | 0.39ns        | 0.32ns      |
| Treatment×time           | 2  | 0.68ns               | 0.81ns         | 1.58ns       | 6.59**              | 2.13ns        | 0.67ns      |
| Accession×time           | 3  | 0.19ns               | 1.57ns         | 0.57ns       | 0.70ns              | 0.28ns        | 2.68\$      |
| Treatment×accession×time | 2  | 1.16ns               | 1.08ns         | 0.22ns       | 0.71ns              | 0.19ns        | 0.19ns      |

F-values and their significance are given. Significance levels are as follows: ns:  $P > 0.1$ ; \$:  $0.05 < P < 0.1$ ; \*:  $0.01 < P < 0.05$ ; \*\*:  $0.001 < P < 0.01$ ; \*\*\*:  $P < 0.001$ .

**Table S3.** The results of three-way ANOVA for the effects of treatment, accession and ABA on the elongation of the 3<sup>rd</sup> oldest petioles of *R. palustris* in 3 d in Figure 3C.

|                         | DF | F value    |
|-------------------------|----|------------|
|                         |    | Elongation |
| Treatment               | 1  | 2140.20*** |
| Accession               | 1  | 96.25***   |
| ABA                     | 3  | 99.93***   |
| Treatment×accession     | 1  | 231.37***  |
| Treatment×ABA           | 3  | 104.25***  |
| Accession×ABA           | 3  | 19.10***   |
| Treatment×accession×ABA | 3  | 18.19***   |

F-values and their significance are given. Significance levels are as follows: \*\*\*:  $P < 0.001$ .

**Table S4.** The results of three-way ANOVA for the effects of treatment, accession and GA on the elongation of the 3<sup>rd</sup> oldest petioles of *R. palustris* in 3 d in Figure 4.

|                        | DF | F value    |
|------------------------|----|------------|
|                        |    | Elongation |
| Treatment              | 1  | 2852.58*** |
| Accession              | 1  | 225.02***  |
| GA                     | 4  | 9.55***    |
| Treatment×accession    | 1  | 135.13***  |
| Treatment×GA           | 4  | 1.01ns     |
| Accession×GA           | 4  | 0.56ns     |
| Treatment×accession×GA | 4  | 1.37ns     |

F-values and their significance are given. Significance levels are as follows: ns:  $P > 0.1$ ; \*\*\*:  $P < 0.001$ .

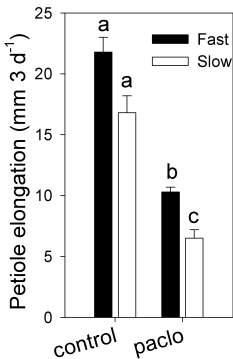

**Figure S5.** Submergence-induced petiole elongation rates over 3 d in the fast and slow *R. palustris* accessions, either or not pre-treated with the GA biosynthesis inhibitor paclobutrazol. Data are means  $\pm$  SE, n=10.

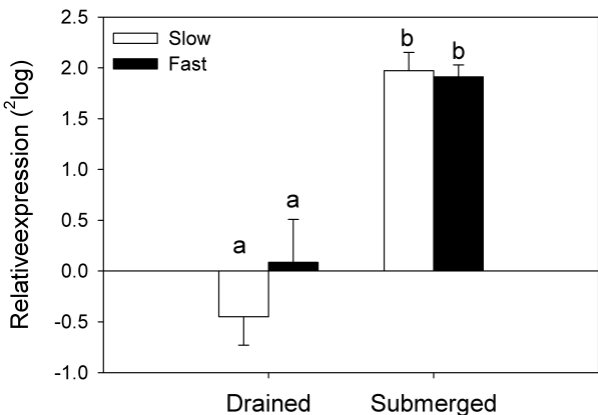

**Figure S6.** Relative transcript abundance of the *R. palustris* *EXPANSIN A1* gene (*RpEXP11*) in the 3rd oldest petiole of the slow (open bars) and fast (closed bars) accessions after 6 h of submerged and drained control treatments. Values are measured with real-time RT-PCR with tubulin as internal standard, relative to the value at  $t=0$  and  $2\log$  transformed. Data are mean  $\pm$  SE,  $n=5-6$ . Different letters indicate significant differences (Games-Howell test,  $P<0.05$ ).
